# Supplementary material
Source: publisher figshare collection journal article supplement (https://acs.figshare.com/ndownloader/files/4111513)
Supplement: Supplementary file 1 [file 4111513]

# Supporting Information

## Synthesis, characterization and activity evaluation of DyVO<sub>4</sub>/g-C<sub>3</sub>N<sub>4</sub> composites under visible light irradiation

*<sup>1</sup>Yiming He\*, <sup>1</sup>Jun Cai, <sup>2</sup>Tingting Li, <sup>2</sup>Ying Wu, <sup>3</sup>Yanmin Yi, <sup>2</sup>Mengfei Luo, <sup>2</sup>Leihong Zhao*

<sup>1</sup>Department of Materials Physics, Zhejiang Normal University, Jinhua, 321004, China

<sup>2</sup>Institute of Physical Chemistry, Zhejiang Key Laboratory for Reactive Chemistry on Solid Surfaces,  
Zhejiang Normal University, Jinhua, 321004, China

<sup>3</sup>Center station of Suzhou Environmental Monitoring, Suzhou, 215004, China

Corresponding author: Tel: +86-0579-83792294; Fax: +86-0579-83714946; E-mail: hym@zjnu.cn

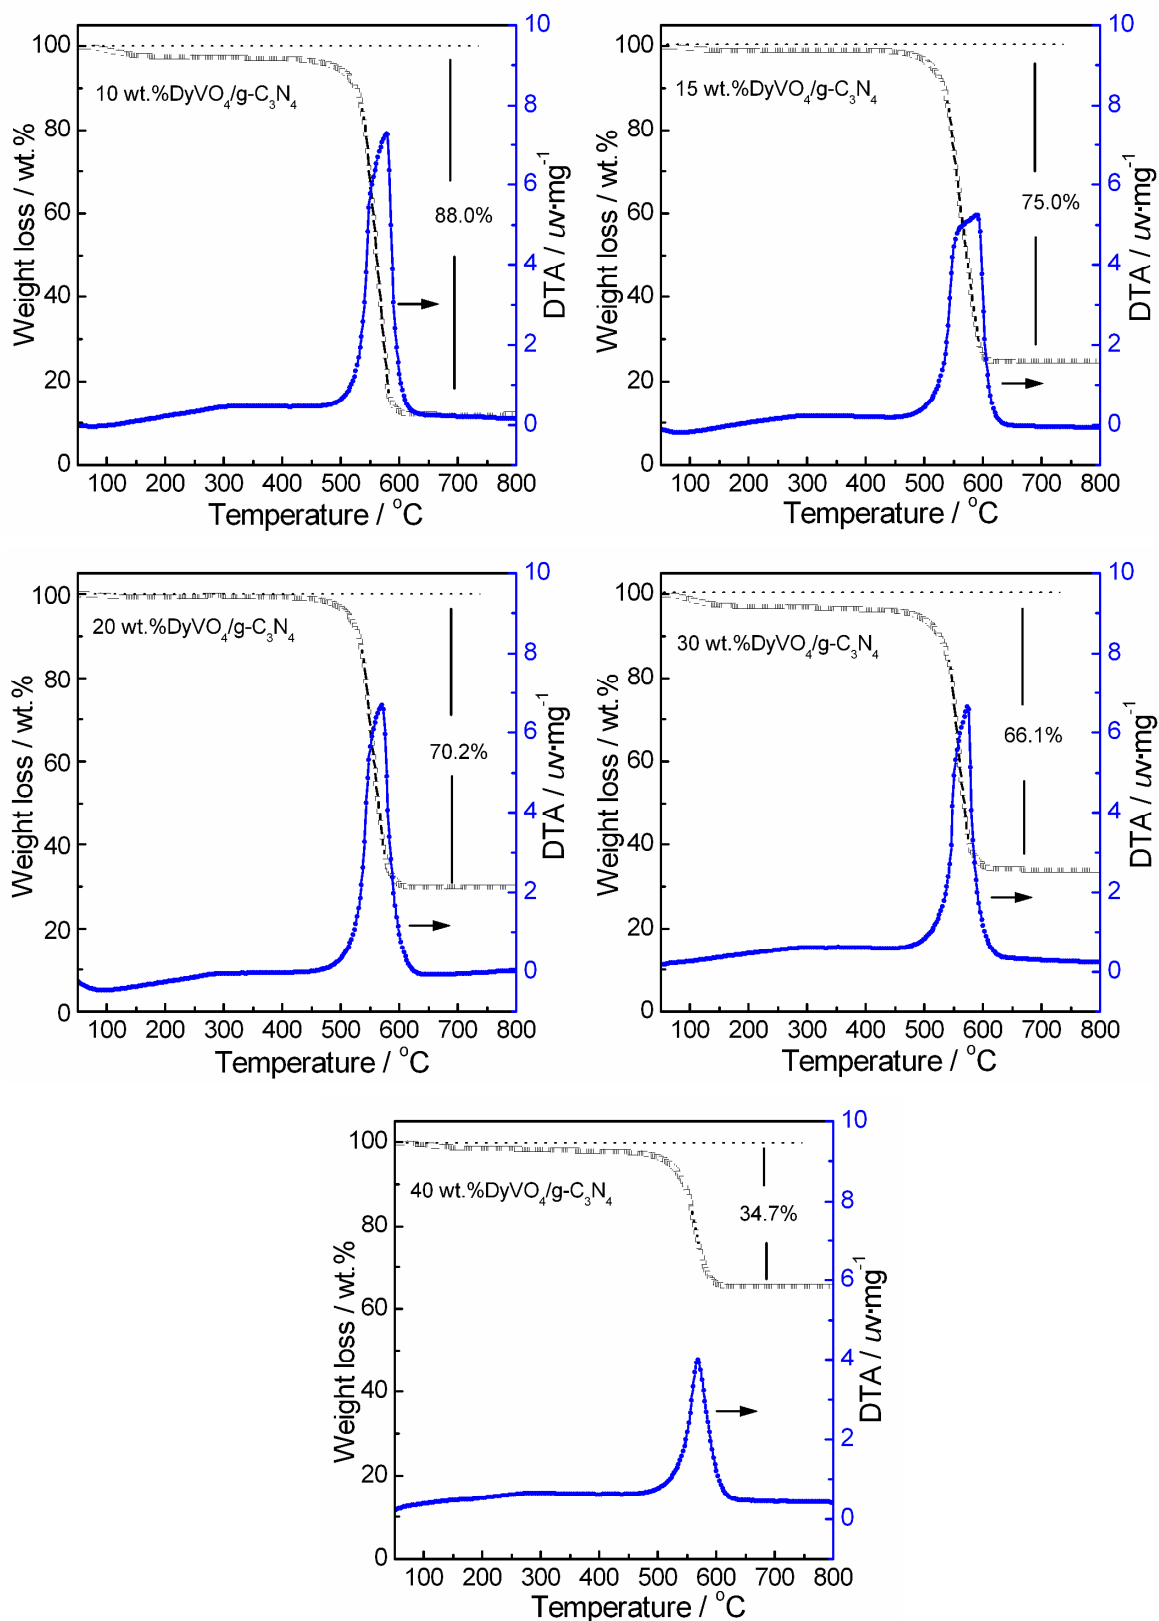

**Figure S1.** TG-DTA thermograms for heating the DyVO<sub>4</sub>/g-C<sub>3</sub>N<sub>4</sub> composites.

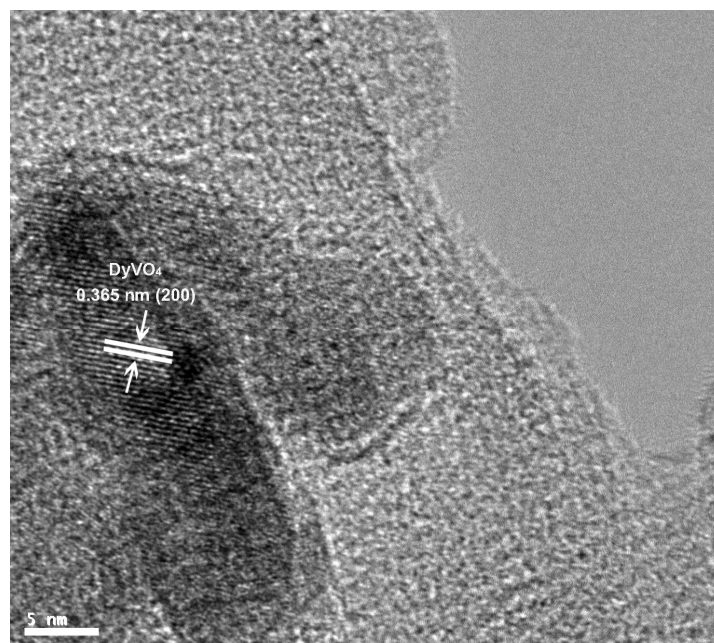

**Figure S2.** HR-TEM of 15 wt.% DyVO<sub>4</sub>/g-C<sub>3</sub>N<sub>4</sub> composite

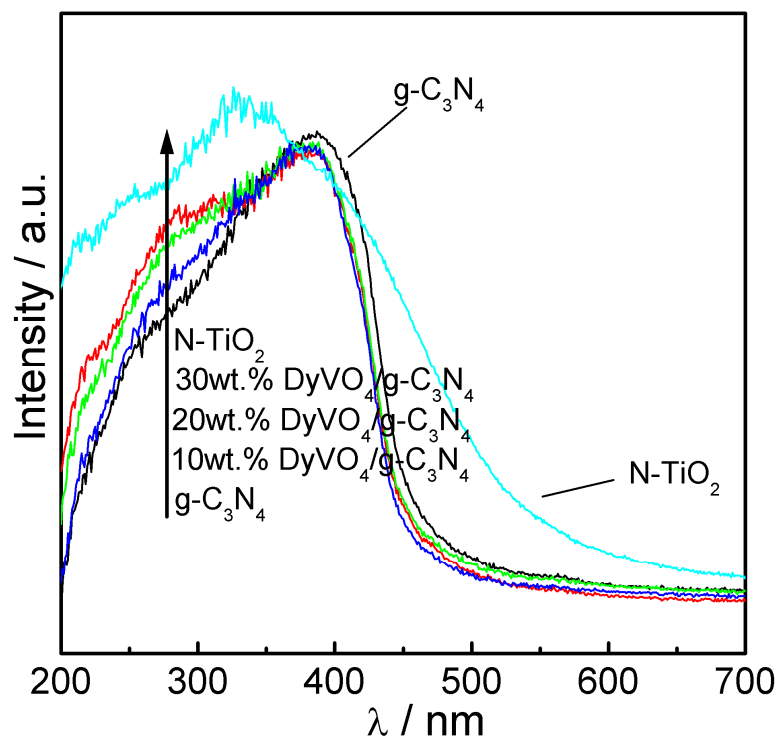

**Figure S3.** UV-vis spectra g-C<sub>3</sub>N<sub>4</sub>, N-TiO<sub>2</sub>, and several DyVO<sub>4</sub>/g-C<sub>3</sub>N<sub>4</sub> composites.

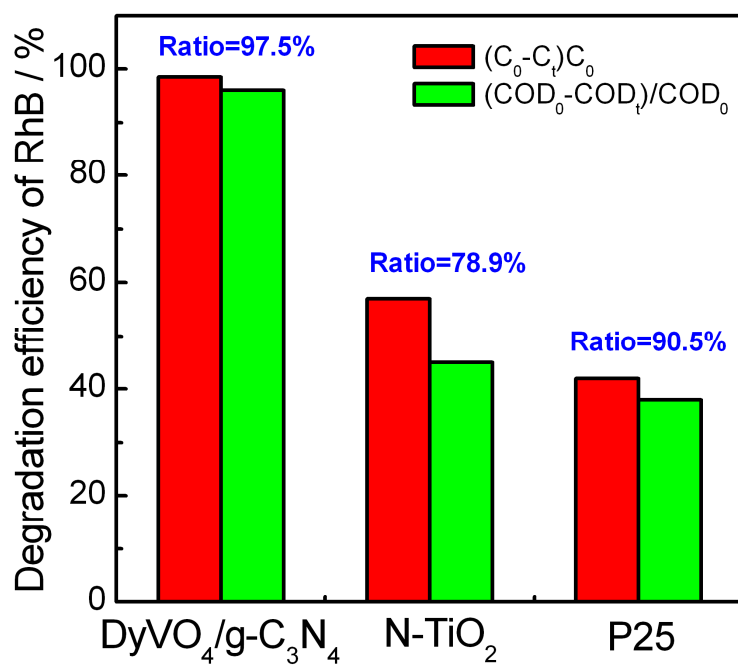

**Figure S4.** Degradation efficiency of 10 ppm RhB solution in the presence of 15wt.% DyVO<sub>4</sub>/g-C<sub>3</sub>N<sub>4</sub>, N-TiO<sub>2</sub>, and P25 under visible light irradiation for 120 min.

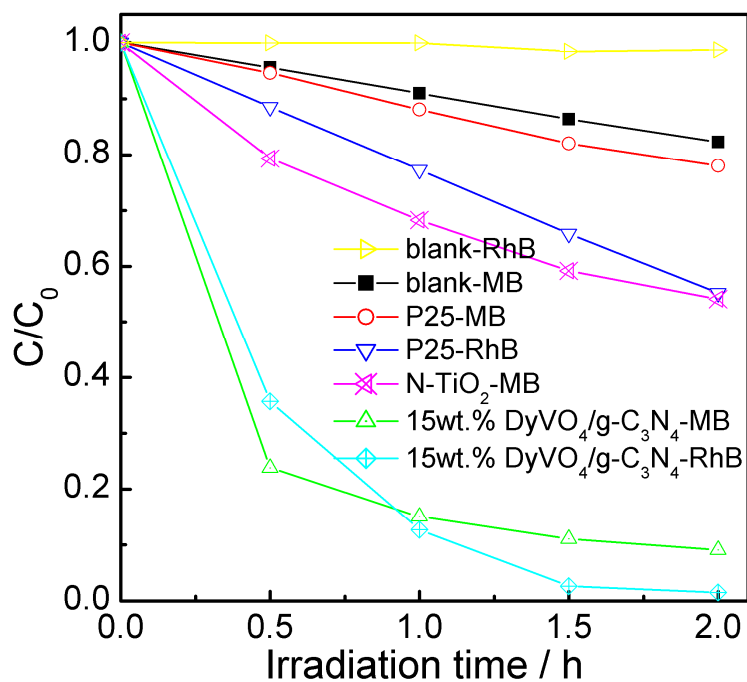

**Figure S5.** Photocatalytic degradation of MB and RhB over different photocatalysts under visible light irradiation.
